# Supplementary material
Source: PubMed Central journal article supplement (PMC8016151)

Figure S1: daily confirmed COVID-19 cases in the first and second waves in Israel

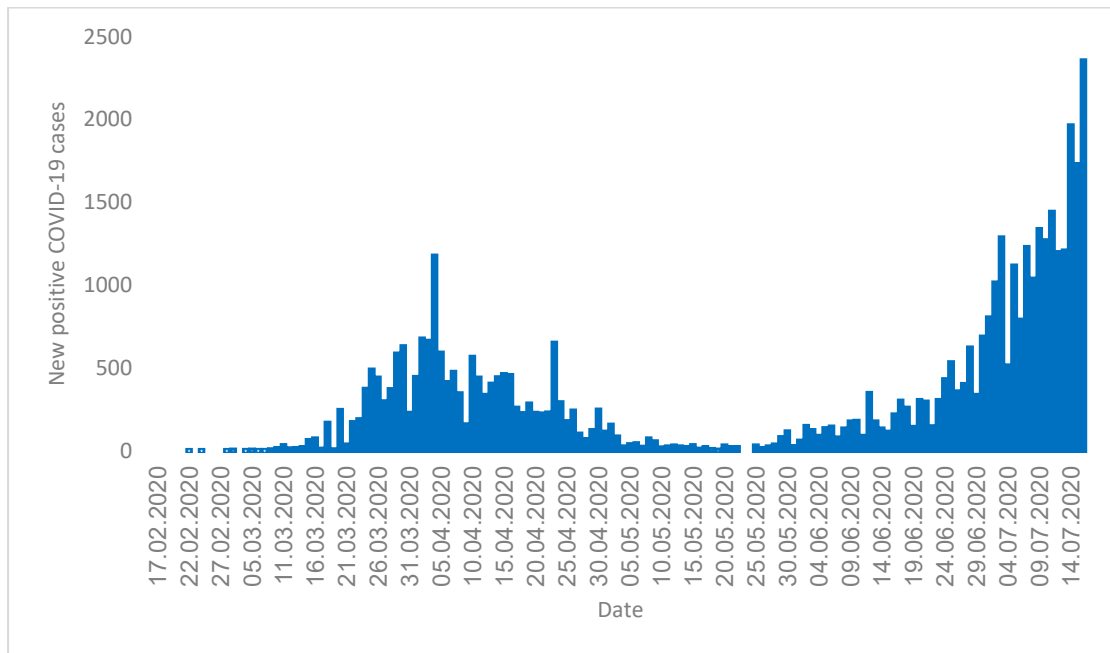

Figure S2: first vs second wave COVID-19-directed drugs in patients with mild to moderate disease

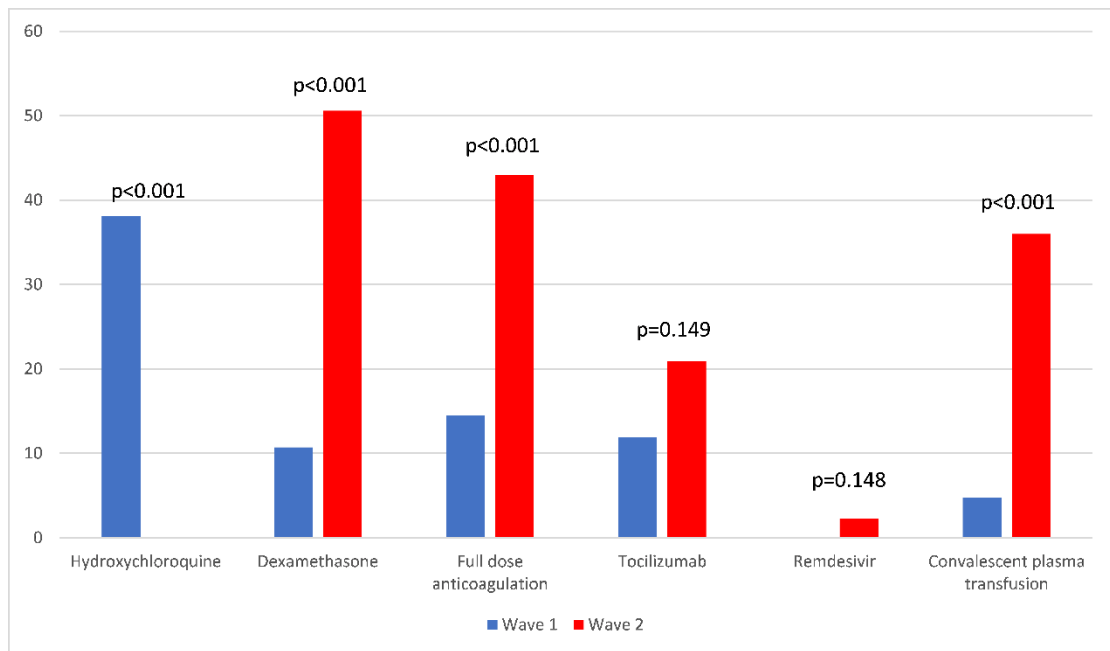

Figure S3: first vs second wave COVID-19-directed combination therapies in patients with mild to moderate disease

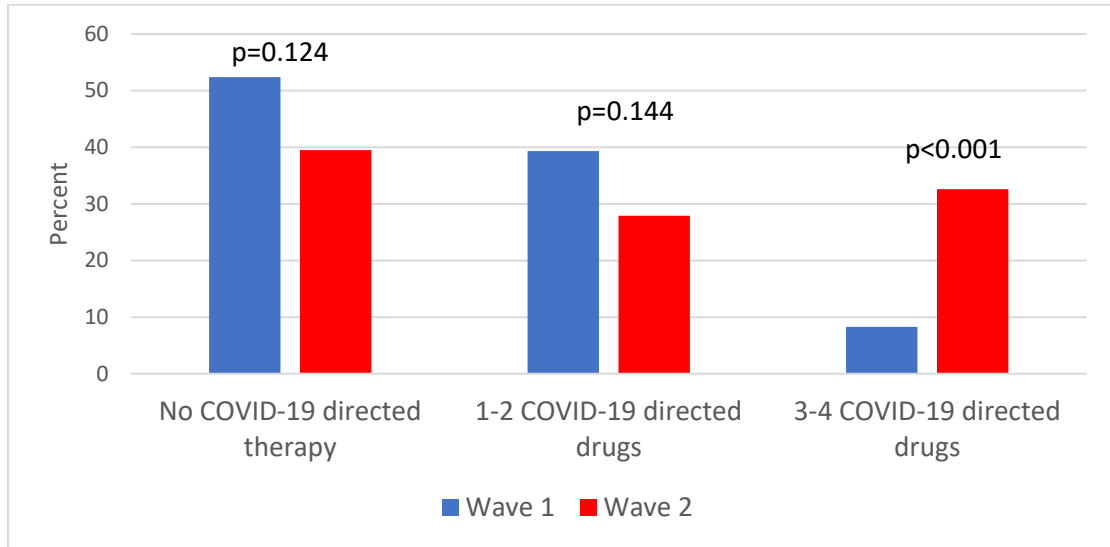

Supplement: 11739_2021_2711_MOESM1_ESM.pdf [file 11739_2021_2711_MOESM1_ESM.pdf]
