# Supplementary material
Source: PubMed Central journal article supplement (PMC8016151)
Supplement: 11739_2021_2711_MOESM2_ESM.pdf [file 11739_2021_2711_MOESM2_ESM.pdf]

Table S1: COVID-19 modified early warning score

|                         | <b>3</b> | <b>2</b> | <b>1</b>  | <b>0</b>  | <b>1</b>  | <b>2</b> | <b>3</b>                              |
|-------------------------|----------|----------|-----------|-----------|-----------|----------|---------------------------------------|
| Age                     |          |          |           | <65       |           |          | ≥65                                   |
| Respiration rate        | ≤8       |          | 9-11      | 12-20     |           | 21-24    | ≥25                                   |
| Oxygen saturation       | ≤91      | 92-93    | 94-95     | ≥96       |           |          |                                       |
| Any supplemental oxygen |          | Yes      |           | No        |           |          |                                       |
| Systolic blood pressure | ≤90      | 91-100   | 101-110   | 111-219   |           |          | ≥220                                  |
| Heart rate              | ≤40      |          | 41-50     | 51-90     | 91-110    | 111-130  | ≥131                                  |
| Consciousness           |          |          |           | Alert     |           |          | Drowsiness, lethargy, coma, confusion |
| Temperature             | ≤35.0    |          | 35.1-36.0 | 36.1-38.0 | 38.1-39.0 | ≥39.1    |                                       |

COVID-19: Coronavirus disease 2019

Table S2: COVID-19 modified early warning score interpretation

| <b>score</b> | <b>Risk grading</b> | <b>Warning level</b> | <b>Monitoring frequency</b> | <b>Clinical response</b>                                                                                                                                                                                                                                                                                                                                                       | <b>Solution</b>                                                             |
|--------------|---------------------|----------------------|-----------------------------|--------------------------------------------------------------------------------------------------------------------------------------------------------------------------------------------------------------------------------------------------------------------------------------------------------------------------------------------------------------------------------|-----------------------------------------------------------------------------|
| 0            | /                   |                      | Q12h                        | Routine monitoring                                                                                                                                                                                                                                                                                                                                                             | /                                                                           |
| 1-4          | Low                 | Yellow               | Q6h                         | Bedside evaluation by nurse                                                                                                                                                                                                                                                                                                                                                    | Maintain existing monitoring/increase monitoring frequency/inform doctor    |
| 5-6          | Medium              | Orange               | Q1-2h                       | Bedside nurse notifies doctor for evaluation                                                                                                                                                                                                                                                                                                                                   | Maintain existing treatment/adjust treatment plan/CCRRT remote consultation |
| $\geq 7$     | High                | Red                  | Continuous                  | Bedside nurse notifies doctor for emergency bedside evaluation<br>CCRRT remote consultation                                                                                                                                                                                                                                                                                    | CCRRT on-site consultation                                                  |
| $\geq 7$     | High                | Black                | Continuous                  | <ul style="list-style-type: none"> <li>• Patients are extremely severe with irreversible end-stage disease facing death, such as serious irreversible brain injury, irreversible multiple organ failure, end-stage chronic liver or lung disease, metastatic tumors, etc.</li> <li>• Should be discussed urgently by the expert group about the admission decision.</li> </ul> |                                                                             |

Abbreviations: COVID-19: Coronavirus disease 2019; CCRT: critical care rapid response team

Table S3: Disease severity classification in accordance with the NIH guidelines

Abbreviations: NIH: national institutes of health

|                             |                                                                                                                                                                                                                                                                                      |
|-----------------------------|--------------------------------------------------------------------------------------------------------------------------------------------------------------------------------------------------------------------------------------------------------------------------------------|
| Asymptomatic/presymptomatic | Individuals who test positive for SARS-CoV-2 by virologic testing using a molecular diagnostic (e.g., polymerase chain reaction) or antigen test, but have no symptoms.                                                                                                              |
| Mild Illness                | Individuals who have any of the various signs and symptoms of COVID 19 (e.g., fever, cough, sore throat, malaise, headache, muscle pain) without shortness of breath, dyspnea, or abnormal chest imaging.                                                                            |
| Moderate Illness            | Individuals who have evidence of lower respiratory disease by clinical assessment or imaging and a saturation of oxygen (SpO <sub>2</sub> ) $\geq$ 94% on room air at sea level.                                                                                                     |
| Severe Illness              | individuals who have respiratory frequency $>$ 30 breaths per minute, SpO <sub>2</sub> $<$ 94% on room air at sea level, ratio of arterial partial pressure of oxygen to fraction of inspired oxygen (PaO <sub>2</sub> /FiO <sub>2</sub> ) $<$ 300 mmHg, or lung infiltrates $>$ 50% |
| Critical Illness            | individuals who have respiratory failure, septic shock, and/or multiple organ dysfunction.                                                                                                                                                                                           |

Abbreviations: NIH: national institutes of health

Table S4: Baseline echocardiographic characteristics of hospitalized patients with COVID-19

| Variable                                                 | Reference value          | All N=186      | p      | first wave N=131 | second wave N=55 | p     |
|----------------------------------------------------------|--------------------------|----------------|--------|------------------|------------------|-------|
| EF, %                                                    | M 62±5<br>F 64±5         | 57.7±5.5       | <0.001 | 57.8±5           | 57.5±6.6         | 0.825 |
| EF <50%                                                  |                          | 11 (6)         |        | 6 (4.6)          | 5 (9.8)          | 0.186 |
| LVEDD, mm                                                | M 50.2±4.1<br>F 45.0±3.6 | 43.4±6.7       | <0.001 | 43.2±6.7         | 43.9±6.5         | 0.535 |
| LVESD, mm                                                | M 32.4±3.7<br>F 28.2±3.3 | 28.4±6         | 0.001  | 28.2±6.1         | 28.9±5.7         | 0.477 |
| Heart rate, (beat/min)                                   | 60-100                   | 78.8±17        | 0.349  | 79±17            | 77±15            | 0.463 |
| Stroke volume index, mL/m <sup>2</sup>                   | 33-47                    | 31.1±9.9       | <0.001 | 31.2±9.8         | 30.7±10.5        | 0.785 |
| Cardiac output index, L/min/min                          | 2.5-4                    | 2.4±0.8        | <0.001 | 2.4±0.8          | 2.3±0.6          | 0.45  |
| LA volume index, mL/m <sup>2</sup>                       | M 25.1±7<br>F 24.5±6.4   | 30.6±12        | <0.001 | 29.1±12.3        | 35.2±12.2        | 0.009 |
| E wave, m/s                                              | 0.67±0.14                | 0.66±0.2       | 0.76   | 0.65±0.22        | 0.69±0.21        | 0.36  |
| A wave, m/s                                              | 0.60±0.17                | 0.65±0.2       | 0.001  | 0.64±0.21        | 0.68±0.22        | 0.358 |
| E/A                                                      | 1.3 [0.8, 2.0]           | 0.91 [0.8-1.2] | <0.001 | 0.9 [0.8-1.2]    | 1 [0.7-1.4]      | 0.845 |
| e' Septal, cm/s                                          | 10.3±3.0                 | 6.4±2.1        | <0.001 | 6.5±2.1          | 6.3±2.1          | 0.575 |
| e' Lateral, cm/s                                         | 13.5±4.0                 | 8.3±2.9        | <0.001 | 8.4±2.8          | 8.2±3.2          | 0.78  |
| E/e' average                                             | 6.8±2.1                  | 10.4±5.7       | <0.001 | 10.3±5.9         | 10.6±5.1         | 0.715 |
| E/e' >14                                                 |                          | 30 (16.8)      |        | 23 (18)          | 7 (14)           | 0.658 |
| PAT, ms                                                  | 137±24                   | 88.96±30       | <0.001 | 90.6±29.5        | 84.3±31.4        | 0.258 |
| PAT <100ms                                               |                          | 98 (67.1)      |        | 67 (63.2)        | 31 (77.5)        | 0.117 |
| RVEDA, cm <sup>2</sup>                                   | M 17±3.5<br>F 14±3       | 21.2±5.4       | <0.001 | 21.1±5.4         | 21.5±5.4         | 0.644 |
| RVESA, cm <sup>2</sup>                                   | M 9±3<br>F 7±2           | 12.4±4.2       | <0.001 | 12.4±4.4         | 12.6±4           | 0.765 |
| RVEDA Index (cm <sup>2</sup> /m <sup>2</sup> )           | M 8.8±1.9<br>F 8.0±1.7   | 11.3±2.6       | <0.001 | 11.3±2.6         | 11.3±2.7         | 0.989 |
| RVEDA Index >12 cm <sup>2</sup> /m <sup>2</sup> )        |                          | 56 (37.5)      |        | 41 (37.3)        | 15 (38.5)        | 1     |
| RVESA Index (cm <sup>2</sup> /m <sup>2</sup> )           | M 4.7±1.3<br>F 4.0±1.2   | 6.6±2.2        | <0.001 | 6.6±2.3          | 6.7±2.1          | 0.884 |
| RVESA Index >7 (cm <sup>2</sup> /m <sup>2</sup> ), n (%) |                          | 48 (32.2)      |        | 34 (30.6)        | 14 (36.8)        | 0.547 |
| RVFAC, %                                                 | 49±7                     | 41.5±12        | <0.001 | 41.5±11.9        | 41.6±12.3        | 0.966 |
| RVFAC<35%, n (%)                                         |                          | 50 (31)        |        | 34 (30.6)        | 16 (32)          | 0.856 |
| TAPSE, mm                                                | 24±3.5                   | 22±5           | <0.001 | 23±6             | 21±5             | 0.118 |
| TAPSE <17 mm                                             |                          | 27 (15.6)      |        | 21 (17.1)        | 6 (12)           | 0.493 |

|                            |          |           |        |           |           |       |
|----------------------------|----------|-----------|--------|-----------|-----------|-------|
| Pulsed RV S'<br>(cm/s)     | 14.1±2.3 | 11.1±3.1  | <0.001 | 11.5±3.3  | 10.2±2.3  | 0.009 |
| Pulsed RV S'<br><9.5(cm/s) |          | 50 (28.9) |        | 30 (24.6) | 20 (39.2) | 0.066 |

Abbreviations: EF, ejection fraction; F, female; LA, left atrium; LV, left ventricle; LVEDD, left ventricular end-diastolic diameter; LVESD, left ventricular end-systolic diameter; M, male; PAT, pulmonic acceleration time; RV, right ventricle; RVEDA, right ventricular end-diastolic area; RVESA, right ventricular end-systolic area; RVFAC, right ventricular fractional area change; TAPSE, Tricuspid Annular Plane Systolic Excursion
